# Supplementary material for: Crystal Structure and Theoretical Analysis of Cs2Ca3(SO4)4
Source: MDPI journal article supplement (doi:10.3390/cryst12020126), 2022-01-18
Supplement: s1 [file s1]

# Supplementary Materials

*Type of the Paper (Article)*

## Crystal Structure and Theoretical Analysis of $\text{Cs}_2\text{Ca}_3(\text{SO}_4)_4$

Penglin Fang <sup>1,§</sup>, Wenyue Tang <sup>1,§</sup>, Yaoguo Shen <sup>1,\*</sup>, Jinquan Hong <sup>1,\*</sup>, Yongming Li <sup>1</sup> and Junrong Jia <sup>1,\*</sup>

<sup>1</sup> College of Physics and Electronic Information Engineering, Minjiang University, Fuzhou, Fujian 350108, PR China

<sup>§</sup> These authors contributed equally.

\* Correspondence: shenyg@mju.edu.cn (Y. Shen); jqhong@mju.edu.cn (J. Hong); jiajr@mju.edu.cn (J. Jia)

**Citation:** Fang, P.; Tang, W.; Shen, Y.; Hong, J.; Li, Y.; Jia, J. Crystal Structure and Theoretical Analysis of  $\text{Cs}_2\text{Ca}_3(\text{SO}_4)_4$ . *Crystals* **2022**, *12*, 126. <https://doi.org/10.3390/cryst12020126>

Academic Editors: Shujun Zhang and Andrei Vladimirovich Shevelkov

Received: 10 December 2021

Accepted: 16 January 2022

Published: 18 January 2022

**Publisher's Note:** MDPI stays neutral with regard to jurisdictional claims in published maps and institutional affiliations.

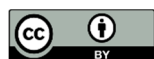

**Copyright:** © 2022 by the authors. Submitted for possible open access publication under the terms and conditions of the Creative Commons Attribution (CC BY) license (<https://creativecommons.org/licenses/by/4.0/>).

Calculation Setting

The kinetic energy absorption, empty bands, k-point sampling, and pseudopotential used for calculating the birefringence were 310 eV, 12,  $1 \times 1 \times 1$ , and ultrasoft for  $\text{Cs}_2\text{Ca}_3(\text{SO}_4)_4$ , 310 eV,  $2 \times 2 \times 1$ , and ultrasoft for  $\text{Cs}_2\text{Mg}_3(\text{SO}_4)_4$ , 310 eV, 12,  $1 \times 1 \times 1$ , and ultrasoft for  $\text{Rb}_2\text{Mg}_3(\text{SO}_4)_4$ , respectively.

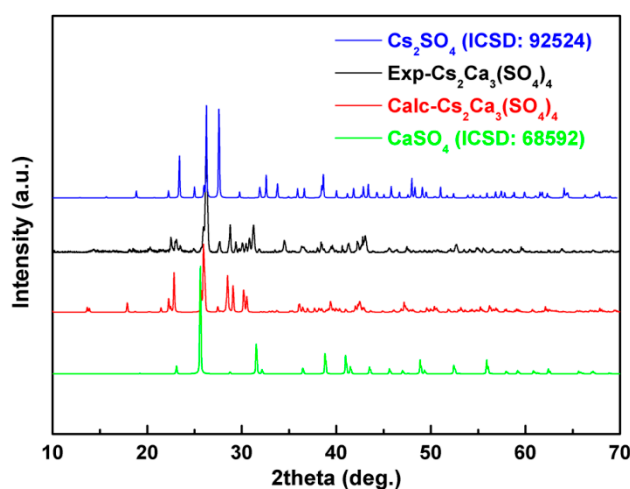

**Figure S1.** The comparison of XRD patterns with raw reagents of  $\text{Cs}_2\text{SO}_4$  and  $\text{CaSO}_4$ .  $\text{Cs}_2\text{SO}_4$ -(ICSD: 92524) represents the calculated XRD pattern of  $\text{Cs}_2\text{SO}_4$  with the Inorganic Crystal Structure Database (ICSD) number of 92524.  $\text{CaSO}_4$ -(ICSD: 68592) represents the calculated XRD pattern of  $\text{Cs}_2\text{SO}_4$  with the ICSD number of 68592.

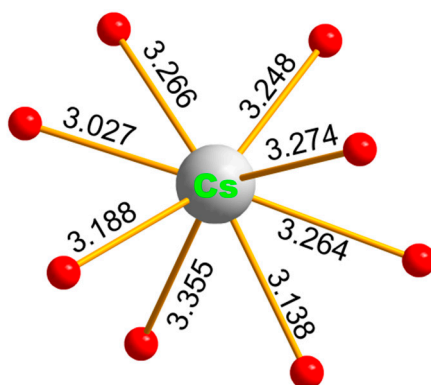

**Figure S2.** The ball-and-stick representation of a  $\text{CsO}_8$  polyhedron in  $\text{Cs}_2\text{Ca}_3(\text{SO}_4)_4$ .

**Table S1.** Crystal data and structure refinement for Cs<sub>2</sub>Ca<sub>3</sub>(SO<sub>4</sub>)<sub>4</sub>.

| Formula sum                                                                              | Cs <sub>2</sub> Ca <sub>3</sub> (SO <sub>4</sub> ) <sub>4</sub> |
|------------------------------------------------------------------------------------------|-----------------------------------------------------------------|
| Formula weight                                                                           | 770.30                                                          |
| Crystal system                                                                           | Monoclinic                                                      |
| Space group                                                                              | <i>P</i> 2 <sub>1</sub> / <i>c</i> (no. 14)                     |
| <i>a</i> (Å)                                                                             | 9.9153(8)                                                       |
| <i>b</i> (Å)                                                                             | 9.3760(6)                                                       |
| <i>c</i> (Å)                                                                             | 9.8044(9)                                                       |
| $\beta$                                                                                  | 118.365(3)                                                      |
| <i>V</i> (Å <sup>3</sup> )                                                               | 802.04(11)                                                      |
| <i>Z</i>                                                                                 | 2                                                               |
| D <sub>calcd</sub> (g cm <sup>-3</sup> )                                                 | 3.190                                                           |
| Temperature (K)                                                                          | 299(2)                                                          |
| $\lambda$ (Å)                                                                            | 0.71073                                                         |
| <i>F</i> (000)                                                                           | 724                                                             |
| Crystal size                                                                             | 0.08 × 0.06 × 0.06 mm <sup>3</sup>                              |
| Data/restraints/parameters                                                               | 1635/0/115                                                      |
| $\mu$ (mm <sup>-1</sup> )                                                                | 6.104                                                           |
| GOF ( <i>F</i> <sup>2</sup> )                                                            | 1.246                                                           |
| <i>R</i> (int)                                                                           | 0.0506                                                          |
| <i>R</i> <sub>1</sub> / <i>wR</i> <sub>2</sub> ( <i>I</i> > 2σ( <i>I</i> )) <sup>a</sup> | 0.0438/0.0832                                                   |
| <i>R</i> <sub>1</sub> / <i>wR</i> <sub>2</sub> (all data)                                | 0.0521/0.0864                                                   |

$$^a) R_1 = \sum ||F_0| - |F_c|| / \sum |F_0| \text{ and } wR_2 = [\sum [w(F_0^2 - F_c^2)^2] / \sum [w(F_0^2)^2]]^{1/2} \text{ for } F_0^2 > 2\sigma(F_c^2)$$

**Table S2.** Atom coordinates and equivalent isotropic displacement parameters for Cs<sub>2</sub>Ca<sub>3</sub>(SO<sub>4</sub>)<sub>4</sub>.

| Atom | Wyck. | Symmetry | <i>x/a</i>   | <i>y/b</i>  | <i>z/c</i>  | <i>U</i> <sub>eq</sub> (Å <sup>2</sup> ) <sup>a</sup> |
|------|-------|----------|--------------|-------------|-------------|-------------------------------------------------------|
| Cs1  | 4e    | 1        | 0.66389(5)   | 0.82800(5)  | 0.55989(5)  | 0.0297(2)                                             |
| Ca1  | 4e    | 1        | 0.24601(14)  | 0.62804(12) | 0.24129(15) | 0.0123(3)                                             |
| Ca2  | 2a    | −1       | 0            | 0           | 0           | 0.0166(4)                                             |
| S1   | 4e    | 1        | 0.39243(16)  | 0.93806(15) | 0.14757(18) | 0.0107(3)                                             |
| S2   | 4e    | 1        | −0.02522(16) | 0.34085(15) | 0.16829(17) | 0.0102(3)                                             |
| O1   | 4e    | 1        | 0.5390(5)    | 1.0101(5)   | 0.2385(6)   | 0.0259(11)                                            |
| O2   | 4e    | 1        | 0.3795(5)    | 0.8283(5)   | 0.2465(5)   | 0.0235(11)                                            |
| O3   | 4e    | 1        | 0.2670(5)    | 1.0420(5)   | 0.1031(6)   | 0.0223(11)                                            |
| O4   | 4e    | 1        | 0.3848(6)    | 0.8735(5)   | 0.0089(6)   | 0.0274(11)                                            |
| O5   | 4e    | 1        | 0.1202(6)    | 0.4159(6)   | 0.2309(6)   | 0.0351(14)                                            |
| O6   | 4e    | 1        | −0.0740(6)   | 0.3377(6)   | 0.2892(6)   | 0.0331(13)                                            |
| O7   | 4e    | 1        | −0.0043(7)   | 0.1920(5)   | 0.1399(7)   | 0.0472(17)                                            |
| O8   | 4e    | 1        | −0.1423(6)   | 0.4069(5)   | 0.0277(5)   | 0.0263(12)                                            |

<sup>a</sup>) *U*<sub>eq</sub> is defined as one-third of the trace of the orthogonalized *U*<sub>ij</sub> tensor.

**Table S3.** Selected bond distances and angles for Cs<sub>2</sub>Ca<sub>3</sub>(SO<sub>4</sub>)<sub>4</sub>.

| Bonds         | Bond<br>distances<br>(Å) | Bonds               | Bond<br>angles (°) | Bonds                | Bond<br>angles (°) |
|---------------|--------------------------|---------------------|--------------------|----------------------|--------------------|
| Cs(1)-O(2)    | 3.026(5)                 | O(1)#5-Ca(1)-O(8)#7 | 85.63(17)          | O(7)-Ca(2)-O(6)#10   | 86.1(2)            |
| Cs(1)-O(1)    | 3.266(5)                 | O(1)#5-Ca(1)-O(6)#1 | 157.01(19)         | O(7)#6-Ca(2)-O(3)#8  | 93.0(2)            |
| Cs(1)-O(3)#4  | 3.275(5)                 | O(2)-Ca(1)-O(6)#11  | 73.39(18)          | O(7)-Ca(2)-O(3)#8    | 87.0(2)            |
| Cs(1)-O(3)#5  | 3.354(5)                 | O(2)-Ca(1)-O(4)#2   | 87.34(17)          | O(7)#6-Ca(2)-O(6)#9  | 86.1(2)            |
| Cs(1)-O(4)#2  | 3.188(5)                 | O(2)-Ca(1)-O(1)#5   | 83.74(18)          | O(7)-Ca(2)-O(6)#9    | 93.9(2)            |
| Cs(1)-O(5)#1  | 3.138(5)                 | O(2)-Ca(1)-O(5)     | 176.3(2)           | O(7)#6-Ca(2)-O(7)    | 180.0              |
| Cs(1)-O(7)#1  | 3.263(6)                 | O(2)-Ca(1)-O(8)#7   | 94.56(17)          | O(7)#6-Ca(2)-O(3)#7  | 87.0(2)            |
| Cs(1)-O(8)#3  | 3.248(5)                 | O(4)#2-Ca(1)-O(5)   | 93.56(19)          | O(7)-Ca(2)-O(3)#7    | 93.0(2)            |
| Ca(1)-O(1)#5  | 2.325(4)                 | O(4)#2-Ca(1)-O(8)#7 | 167.92(18)         | O(6)#9-Ca(2)-O(6)#10 | 180.0(2)           |
| Ca(1)-O(2)    | 2.284(5)                 | O(4)#2-Ca(1)-O(1)#5 | 82.71(18)          | O(1)-S(1)-O(2)       | 107.2(3)           |
| Ca(1)-O(4)#2  | 2.312(5)                 | O(4)#2-Ca(1)-O(6)#1 | 98.25(18)          | O(1)-S(1)-O(3)       | 109.3(3)           |
| Ca(1)-O(5)    | 2.324(5)                 | O(5)-Ca(1)-O(1)#5   | 92.8(2)            | O(2)-S(1)-O(3)       | 109.5(3)           |
| Ca(1)-O(6)#11 | 2.526(5)                 | O(5)-Ca(1)-O(8)#7   | 83.82(19)          | O(4)-S(1)-O(1)       | 110.9(3)           |
| Ca(1)-O(8)#7  | 2.354(5)                 | O(5)-Ca(1)-O(6)#11  | 110.04(19)         | O(4)-S(1)-O(2)       | 110.2(3)           |
| Ca(2)-O(3)#7  | 2.376(5)                 | O(8)#7-Ca(1)-O(6)#1 | 93.72(17)          | O(4)-S(1)-O(3)       | 109.6(3)           |
| Ca(2)-O(3)#8  | 2.376(5)                 | O(3)#7-Ca(2)-O(6)#1 | 85.15(17)          | O(5)-S(2)-O(6)       | 107.9(3)           |
| Ca(2)-O(6)#9  | 2.384(5)                 | O(3)#8-Ca(2)-O(6)#1 | 94.85(17)          | O(5)-S(2)-O(7)       | 110.0(4)           |
| Ca(2)-O(6)#10 | 2.384(5)                 | O(3)#7-Ca(2)-O(6)#9 | 94.85(17)          | O(7)-S(2)-O(6)       | 105.4(4)           |
| Ca(2)-O(7)#6  | 2.276(5)                 | O(3)#8-Ca(2)-O(6)#9 | 85.15(17)          | O(8)-S(2)-O(5)       | 112.3(3)           |
| Ca(2)-O(7)    | 2.276(5)                 | O(3)#7-Ca(2)-O(3)#8 | 180.0              | O(8)-S(2)-O(6)       | 110.5(3)           |
| S(1)-O(1)     | 1.461(4)                 | O(7)#6-Ca(2)-O(6)#1 | 93.9(2)            | O(8)-S(2)-O(7)       | 110.4(3)           |
| S(1)-O(2)     | 1.461(5)                 |                     |                    |                      |                    |
| S(1)-O(3)     | 1.474(4)                 |                     |                    |                      |                    |
| S(1)-O(4)     | 1.457(5)                 |                     |                    |                      |                    |
| S(2)-O(5)     | 1.453(5)                 |                     |                    |                      |                    |
| S(2)-O(6)     | 1.478(5)                 |                     |                    |                      |                    |
| S(2)-O(7)     | 1.457(5)                 |                     |                    |                      |                    |
| S(2)-O(8)     | 1.453(5)                 |                     |                    |                      |                    |

Symmetry transformations used to generate equivalent atoms: (#1) 1-x, 1-y, 1-z; (#2) x, 1.5-y, 0.5+z; (#3) 1+x, 1.5-y, 0.5+z; (#4) 1-x, 2-y, 1-z; (#5) 1-x, -0.5+y, 0.5-z; (#6) -x, -y, -z; (#7) -x, 1-y, -z; (#8) x, -1+y, z; (#9) -x, -0.5+y, 0.5-z; (#10) x, 0.5-y, -0.5+z; (#11) -x, 0.5+y, 0.5-z.

**Table S4.** Anisotropic displacement parameters for Cs<sub>2</sub>Ca<sub>3</sub>(SO<sub>4</sub>)<sub>4</sub>.

| Atom | $U_{11}$ (Å <sup>2</sup> ) | $U_{22}$ (Å <sup>2</sup> ) | $U_{33}$ (Å <sup>2</sup> ) | $U_{23}$ (Å <sup>2</sup> ) | $U_{13}$ (Å <sup>2</sup> ) | $U_{12}$ (Å <sup>2</sup> ) |
|------|----------------------------|----------------------------|----------------------------|----------------------------|----------------------------|----------------------------|
| Cs1  | 0.0245(3)                  | 0.0295(3)                  | 0.0202(3)                  | 0.00058(19)                | −0.00149(19)               | 0.00301(19)                |
| Ca1  | 0.0092(6)                  | 0.0104(6)                  | 0.0132(7)                  | −0.0012(4)                 | 0.0018(5)                  | 0.0022(5)                  |
| Ca2  | 0.0136(9)                  | 0.0124(8)                  | 0.0155(10)                 | 0.0046(7)                  | 0.0001(7)                  | −0.0053(7)                 |
| S1   | 0.0098(7)                  | 0.0116(7)                  | 0.0100(7)                  | −0.0023(5)                 | 0.0042(6)                  | −0.0005(6)                 |
| S2   | 0.0105(7)                  | 0.0105(7)                  | 0.0094(7)                  | −0.0017(5)                 | 0.0046(6)                  | −0.0018(6)                 |
| O1   | 0.014(2)                   | 0.037(3)                   | 0.022(3)                   | −0.015(2)                  | 0.005(2)                   | −0.003(2)                  |
| O2   | 0.023(2)                   | 0.025(2)                   | 0.016(3)                   | −0.008(2)                  | 0.005(2)                   | 0.007(2)                   |
| O3   | 0.019(2)                   | 0.022(2)                   | 0.025(3)                   | 0.0101(19)                 | 0.009(2)                   | 0.005(2)                   |
| O4   | 0.026(3)                   | 0.043(3)                   | 0.014(3)                   | −0.001(2)                  | 0.010(2)                   | −0.011(2)                  |
| O5   | 0.020(3)                   | 0.039(3)                   | 0.031(3)                   | −0.021(2)                  | 0.000(2)                   | 0.012(2)                   |
| O6   | 0.029(3)                   | 0.057(4)                   | 0.022(3)                   | −0.010(3)                  | 0.019(2)                   | −0.003(3)                  |
| O7   | 0.056(4)                   | 0.025(3)                   | 0.036(3)                   | 0.015(3)                   | 0.001(3)                   | −0.021(3)                  |
| O8   | 0.027(3)                   | 0.027(3)                   | 0.012(3)                   | 0.004(2)                   | −0.001(2)                  | 0.004(2)                   |
